# Supplementary material
Source: PubMed Central journal article supplement (PMC3554450)
Supplement: hdy201276x1.pdf [file hdy201276x1.pdf]

**Most represented contigs and corresponding annotation against the *Oryza sativa* database of *Spartina maritima* (normalized and non-normalized) and *Spartina alterniflora*. In brackets, the read de**

| Dataset                           | Contig Number                                                                                                                                                                                                                                                                                                                                                                                                                                                                                       | Accession Number                                                                                                                                                                                                                                                                                                                                                                                                                                                               | Annotation                                                                                                                                                                                                                                                                                                                                                                                                                                                                                                                 |                                                                                                                                                                                                                                                                                                                                                                                                                                                                                                                                                                                                                                                                                                                                                                                                                  |                                                                                                                                                                                                                                                                                                                                                                                                                                                                                                                                                                                                                                                                                                                                                                                                                                                                                                                                                                                                                                                                                          |                                                                                                                                                                                        |
|-----------------------------------|-----------------------------------------------------------------------------------------------------------------------------------------------------------------------------------------------------------------------------------------------------------------------------------------------------------------------------------------------------------------------------------------------------------------------------------------------------------------------------------------------------|--------------------------------------------------------------------------------------------------------------------------------------------------------------------------------------------------------------------------------------------------------------------------------------------------------------------------------------------------------------------------------------------------------------------------------------------------------------------------------|----------------------------------------------------------------------------------------------------------------------------------------------------------------------------------------------------------------------------------------------------------------------------------------------------------------------------------------------------------------------------------------------------------------------------------------------------------------------------------------------------------------------------|------------------------------------------------------------------------------------------------------------------------------------------------------------------------------------------------------------------------------------------------------------------------------------------------------------------------------------------------------------------------------------------------------------------------------------------------------------------------------------------------------------------------------------------------------------------------------------------------------------------------------------------------------------------------------------------------------------------------------------------------------------------------------------------------------------------|------------------------------------------------------------------------------------------------------------------------------------------------------------------------------------------------------------------------------------------------------------------------------------------------------------------------------------------------------------------------------------------------------------------------------------------------------------------------------------------------------------------------------------------------------------------------------------------------------------------------------------------------------------------------------------------------------------------------------------------------------------------------------------------------------------------------------------------------------------------------------------------------------------------------------------------------------------------------------------------------------------------------------------------------------------------------------------------|----------------------------------------------------------------------------------------------------------------------------------------------------------------------------------------|
| <i>S. maritima</i> non-normalized |                                                                                                                                                                                                                                                                                                                                                                                                                                                                                                     |                                                                                                                                                                                                                                                                                                                                                                                                                                                                                |                                                                                                                                                                                                                                                                                                                                                                                                                                                                                                                            |                                                                                                                                                                                                                                                                                                                                                                                                                                                                                                                                                                                                                                                                                                                                                                                                                  |                                                                                                                                                                                                                                                                                                                                                                                                                                                                                                                                                                                                                                                                                                                                                                                                                                                                                                                                                                                                                                                                                          |                                                                                                                                                                                        |
| Leaves                            | contig06360 (18 325.1), contig05746 (11 481.1),<br>contig04972 (9 310.9), contig02305 (6 097.2)<br>contig06401 (3 041.2), contig05764 (2 927),<br>contig06032 (2 794.7), contig05289 (2 718.7),<br>contig06384 (2 511.6), contig06329 (2 409.4),<br>contig06046 (2 318.4), contig06352 (2 208.4),<br>contig06744 (1 968)<br>contig06655 (2 423.4), contig06661 (2 402.7),<br>contig05494 (2 174.9), contig06324 (2 160.5),<br>contig01259 (1 708)<br>contig05784 (1 671.2)<br>contig06407 (1 577.1) | LOC_Os01g57968.1 13101.m14919 cDNA<br><br>LOC_Os12g33946.1 13112.m08842 cDNA<br><br>LOC_Os10g21372.1 13110.m07742 cDNA<br><br>LOC_Os10g21374.1 13110.m07741 cDNA<br>LOC_Os10g38272.1 13110.m07798 cDNA                                                                                                                                                                                                                                                                         | expressed protein, 23S ribosomal gene<br><br>cytochrome c oxidase subunit 1, putative<br><br>chloroplast 30S ribosomal protein S7, putative<br><br>chloroplast 30S ribosomal protein S12, putative<br>ATP synthase B chain, putative                                                                                                                                                                                                                                                                                       |                                                                                                                                                                                                                                                                                                                                                                                                                                                                                                                                                                                                                                                                                                                                                                                                                  |                                                                                                                                                                                                                                                                                                                                                                                                                                                                                                                                                                                                                                                                                                                                                                                                                                                                                                                                                                                                                                                                                          |                                                                                                                                                                                        |
|                                   | Roots                                                                                                                                                                                                                                                                                                                                                                                                                                                                                               | contig05753 (1 749.4), contig06164 (1 659.9),<br>contig06142 (1 573.8), contig06134 (1 522.1),<br>contig06131 (1253.6)<br>contig05892 (667.2), contig06467 (574.9),<br>contig01977 (376.1)<br>contig02011 (431.7)<br>contig01822 (175.5)<br>contig01851 (172.1)<br>contig05944 (165.2), contig05742 (81.1)<br>contig00912 (158.4)<br><br>contig00021 (120.5)<br><br>contig00013 (106.2)<br>contig01971 (103.2)<br>contig05122 (93)<br>contig00352 (82.3)<br>contig05764 (82.1) | LOC_Os12g33946.1 13112.m08842 cDNA<br><br>LOC_Os12g34018.1 13112.m08837 cDNA<br><br>LOC_Os11g21804.1 13111.m02102 cDNA<br>LOC_Os12g34054.1 13112.m08820 cDNA<br>LOC_Os09g00999.1 13109.m00002 cDNA<br>LOC_Os03g17870.1 13103.m02135 cDNA<br>LOC_Os12g34108.1 13112.m08831 cDNA<br><br>LOC_Os04g16722.1 13104.m11802 cDNA<br><br>LOC_Os12g34014.1 13112.m08836 cDNA<br>LOC_Os09g01000.1 13109.m00003 cDNA<br>LOC_Os09g00999.1 13109.m00002 cDNA<br>LOC_Os04g46390.1 13104.m04668 cDNA<br>LOC_Os07g43730.1 13107.m04594 cDNA | cytochrome c oxidase subunit 1, putative<br><br>ATP synthase protein YMF19, putative, expressed<br><br>expressed protein<br>mitochondrial ribosomal protein S3, putative, expressed<br>conserved hypothetical protein, 18S ribosomal RNA gene<br>metallothionein, putative, expressed<br>ATP synthase protein 9, mitochondrial, putative, expressed<br>uncharacterized protein ycf68, putative, expressed, small subunit<br>ribosomal gene<br>NADH-ubiquinone oxidoreductase chain 6, putative<br>expressed protein, 26S ribosomal gene<br>conserved hypothetical protein, 18S ribosomal gene<br>chaperone protein DnaJ, putative, expressed<br>transcription elongation factor 1, putative, expressed                                                                                                           |                                                                                                                                                                                                                                                                                                                                                                                                                                                                                                                                                                                                                                                                                                                                                                                                                                                                                                                                                                                                                                                                                          |                                                                                                                                                                                        |
|                                   |                                                                                                                                                                                                                                                                                                                                                                                                                                                                                                     | <i>S. maritima</i> normalized                                                                                                                                                                                                                                                                                                                                                                                                                                                  |                                                                                                                                                                                                                                                                                                                                                                                                                                                                                                                            |                                                                                                                                                                                                                                                                                                                                                                                                                                                                                                                                                                                                                                                                                                                                                                                                                  |                                                                                                                                                                                                                                                                                                                                                                                                                                                                                                                                                                                                                                                                                                                                                                                                                                                                                                                                                                                                                                                                                          |                                                                                                                                                                                        |
|                                   |                                                                                                                                                                                                                                                                                                                                                                                                                                                                                                     | Leaves                                                                                                                                                                                                                                                                                                                                                                                                                                                                         | contig00002 (342.9)<br><br>contig01621 (66.6)<br>contig00001 (43.3)<br>contig00324 (43.6)<br>contig01339 (34.5)<br>contig02883 (33.3)<br>contig00491 (30.9), contig01366 (25.7)<br>contig01349 (30.4)<br>contig03313 (28)<br><br>contig02273 (27.5)<br><br>contig01561 (27.2)<br>contig00510 (24)<br>contig01408 (66.6)<br>contig02194 (20.6)<br>contig01384 (20)<br>contig01593 (19)<br><br>contig03171 (18.1)<br><br>contig00506 (17.6)<br>contig01879 (17.5)                                                            | LOC_Os04g16722.1 13104.m11802 cDNA<br><br>LOC_Os12g34154.1 13112.m08815 cDNA<br>LOC_Os01g57968.1 13101.m14919 cDNA<br>LOC_Os10g34540.1 13110.m03075 cDNA<br>LOC_Os04g10380.1 13104.m00933 cDNA<br>LOC_Os08g27840.2 13108.m02871 cDNA<br>LOC_Os09g01000.1 13109.m00003 cDNA<br>LOC_Os12g34018.1 13112.m08837 cDNA<br>LOC_Os03g15050.4 13103.m01762 cDNA<br><br>LOC_Os01g45274.4 13101.m04641 cDNA<br><br>LOC_Os07g08840.1 13107.m00879 cDNA<br>LOC_Os03g40010.1 13103.m04335 cDNA<br>LOC_Os10g38272.1 13110.m07798 cDNA<br>LOC_Os02g27030.1 13102.m02936 cDNA<br>LOC_Os10g38276.1 13110.m07796 cDNA<br>LOC_Os06g01210.1 13106.m00020 cDNA<br><br>LOC_Os12g08770.1 13112.m00930 cDNA<br><br>LOC_Os01g13770.2 13101.m01518 cDNA<br>LOC_Os08g06550.1 13108.m00669 cDNA                                               | uncharacterized protein ycf68, putative, expressed, 23S ribosomal<br>RNA gene<br>ribosomal protein S2, putative, expressed<br>expressed protein, 23S ribosomal RNA gene<br>tetratricopeptide repeat protein 1, putative, expressed<br>glycine-rich protein, putative, expressed<br>phosphoenolpyruvate carboxylase, putative, expressed<br>expressed protein, 26S ribosomal RNA gene<br>ATP synthase protein YMF19, putative, expressed<br>phosphoenolpyruvate carboxykinase, putative, expressed<br><br>carbonic anhydrase, chloroplast precursor, putative, expressed<br><br>thioredoxin, putative, expressed<br>DEK C terminal domain containing protein, expressed<br>ATP synthase B chain, putative<br>cysteine proteinase 1 precursor, putative, expressed<br>chloroplast ATP synthase a chain precursor, putative<br>plastocyanin, chloroplast precursor, putative, expressed<br>photosystem I reaction center subunit N, chloroplast precursor,<br>putative, expressed<br>DUF250 domain containing protein, putative, expressed<br>acyl CoA binding protein, putative, expressed |                                                                                                                                                                                        |
| Roots                             |                                                                                                                                                                                                                                                                                                                                                                                                                                                                                                     |                                                                                                                                                                                                                                                                                                                                                                                                                                                                                | contig00795 (36.7)<br>contig01125 (27.3)<br>contig00096 (25.6)<br><br>contig01436 (18.9)<br><br>contig00147 (17.2)<br>contig03250 (16.2)<br>contig00940 (15.3)<br>contig05812 (14.9)<br><br>contig00400 (13.2)<br><br>contig00627 (12.8)<br>contig01117 (12.4)<br>contig05100 (12.1)<br>contig00460 (11.5)<br><br>contig00639 (10.8)<br><br>contig00885 (10.5)<br>contig03805 (10)<br>contig01389 (9.7)<br>contig03975 (9.2)<br><br>contig00945 (9.2)<br><br>contig02485 (9.2)                                             | LOC_Os07g14270.3 13107.m01489 cDNA<br>LOC_Os09g33986.2 13109.m03404 cDNA<br>LOC_Os05g41060.2 13105.m04351 cDNA<br><br>LOC_Os02g40514.2 13102.m04519 cDNA<br><br>LOC_Os03g38020.1 13103.m04133 cDNA<br>LOC_Os03g27320.5 13103.m03191 cDNA<br>LOC_Os03g58204.2 13103.m06395 cDNA<br>LOC_Os05g51510.2 13105.m05557 cDNA<br><br>LOC_Os07g49400.4 13107.m05312 cDNA<br><br>LOC_Os10g34540.1 13110.m03075 cDNA<br>LOC_Os02g45650.1 13102.m05121 cDNA<br>LOC_Os01g48420.1 13101.m05023 cDNA<br>LOC_Os01g49250.1 13101.m05120 cDNA<br><br>LOC_Os04g54870.2 13104.m05681 cDNA<br><br>LOC_Os06g35910.2 13106.m03708 cDNA<br>LOC_Os01g69110.1 13101.m07545 cDNA<br>LOC_Os03g18180.1 13103.m02177 cDNA<br>LOC_Os12g04240.2 13112.m00403 cDNA<br><br>LOC_Os10g30190.1 13110.m02594 cDNA<br>LOC_Os09g00999.1 13109.m00002 cDNA | calreticulin precursor protein, putative, expressed<br>peptidase, T1 family, putative, expressed<br>ADP-ribosylation factor, putative, expressed<br><br>h/ACA ribonucleoprotein complex subunit 3, putative, expressed<br><br>mps one binder kinase activator-like 1A, putative, expressed<br>steroid binding protein, putative, expressed<br>ribosomal protein L4, putative, expressed<br>protein phosphatase 2C, putative, expressed<br>OsAPx2 - Cytosolic Ascorbate Peroxidase encoding gene 4,5,6,8,<br>expressed<br>tetratricopeptide repeat protein 1, putative, expressed<br>peptidase, putative, expressed<br>peroxiredoxin, putative, expressed<br>methyltransferase, putative, expressed<br><br>RNA recognition motif containing protein, putative, expressed<br><br>FYVE zinc finger domain containing protein, expressed<br>expressed protein<br>ranBP1 domain containing protein, expressed<br>peflin, putative, expressed<br>BTBP2 - Bric-a-Brac, Tramtrack, Broad Complex BTB domain with<br>pentapeptide repeats, expressed<br>conserved hypothetical protein            |                                                                                                                                                                                        |
|                                   |                                                                                                                                                                                                                                                                                                                                                                                                                                                                                                     |                                                                                                                                                                                                                                                                                                                                                                                                                                                                                | <i>S. alterniflora</i> non-normalized                                                                                                                                                                                                                                                                                                                                                                                                                                                                                      |                                                                                                                                                                                                                                                                                                                                                                                                                                                                                                                                                                                                                                                                                                                                                                                                                  |                                                                                                                                                                                                                                                                                                                                                                                                                                                                                                                                                                                                                                                                                                                                                                                                                                                                                                                                                                                                                                                                                          |                                                                                                                                                                                        |
|                                   |                                                                                                                                                                                                                                                                                                                                                                                                                                                                                                     |                                                                                                                                                                                                                                                                                                                                                                                                                                                                                | Leaves                                                                                                                                                                                                                                                                                                                                                                                                                                                                                                                     | contig03290 (2 319.3), contig03267 (1 745.3)<br>contig01303 (1 758), contig03531 (1512),<br>contig03397 (1 509.8), contig01341 (1366.9)<br>contig03376 (802.5)<br>contig01553 (784.4)                                                                                                                                                                                                                                                                                                                                                                                                                                                                                                                                                                                                                            | LOC_Os01g57968.1 13101.m14919 cDNA<br><br>LOC_Os12g33946.1 13112.m08842 cDNA<br><br>LOC_Os10g21230.1 13110.m07701 cDNA<br>LOC_Os06g16380.1 13106.m01806 cDNA                                                                                                                                                                                                                                                                                                                                                                                                                                                                                                                                                                                                                                                                                                                                                                                                                                                                                                                             | expressed protein, 23S ribosomal gene<br><br>cytochrome c oxidase subunit 1, putative<br><br>ATP synthase C chain, putative, expressed<br>hypothetical protein, 26S ribosomal RNA gene |

|       |                                                                                                                                                                                      |                                    |                                                                                          |
|-------|--------------------------------------------------------------------------------------------------------------------------------------------------------------------------------------|------------------------------------|------------------------------------------------------------------------------------------|
|       | contig01310 (771.6), contig01296 (746.2)                                                                                                                                             | LOC_Os04g16866.1 13104.m11743 cDNA | photosystem II reaction center protein K precursor, putative, expressed                  |
|       | contig01349 (695.2)                                                                                                                                                                  | LOC_Os10g21268.1 13110.m07703 cDNA | expressed protein, chloroplast gene                                                      |
|       | contig01380 (681.7)                                                                                                                                                                  | LOC_Os10g21190.1 13110.m01750 cDNA | expressed protein, 23S ribosomal RNA gene                                                |
|       | contig01369 (662.3), contig03686 (543.8), contig03483 (470.9)                                                                                                                        | LOC_Os06g39712.1 13106.m10424 cDNA | OsClp10 - Putative Clp protease homologue, expressed                                     |
|       | contig01291 (536.9)                                                                                                                                                                  | LOC_Os12g34014.1 13112.m08836 cDNA | NADH-ubiquinone oxidoreductase chain 6, putative                                         |
|       | contig01702 (529.2), contig03396 (467)                                                                                                                                               | LOC_Os02g57280.1 13102.m06592 cDNA | CBS domain containing membrane protein, putative, expressed                              |
|       | contig01317 (435.4)                                                                                                                                                                  | LOC_Os12g34018.1 13112.m08837 cDNA | ATP synthase protein YMF19, putative, expressed                                          |
|       | contig01307 (327.2)                                                                                                                                                                  | LOC_Os01g58039.1 13101.m14878 cDNA | uncharacterized protein ycf70, putative, expressed                                       |
| Roots | contig04494 (2 361.6), contig12120 (2 165.7), contig05100 (2 137.2), contig08502 (1 936.2), contig11304 (1 736.2), contig11282 (1 519.8), contig11265 (1 398.3), contig11262 (1 202) | LOC_Os12g33946.1 13112.m08842 cDNA | cytochrome c oxidase subunit 1, putative                                                 |
|       | contig10819 (543.2), contig10879 (415.2)                                                                                                                                             | LOC_Os12g34018.1 13112.m08837 cDNA | ATP synthase protein YMF19, putative, expressed                                          |
|       | contig03506 (237.1), contig04387 (164.3)                                                                                                                                             | LOC_Os08g28670.1 13108.m02960 cDNA | pathogenesis-related Bet v I family protein, putative, expressed                         |
|       | contig05457 (224.5)                                                                                                                                                                  | LOC_Os09g01000.1 13109.m00003 cDNA | expressed protein, 26S ribosomal RNA gene                                                |
|       | contig10811 (205.4)                                                                                                                                                                  | LOC_Os11g21804.2 13111.m02103 cDNA | expressed protein                                                                        |
|       | contig11123 (189.9)                                                                                                                                                                  | LOC_Os08g06550.1 13108.m00669 cDNA | acyl CoA binding protein, putative, expressed                                            |
|       | contig03774 (180)                                                                                                                                                                    | LOC_Os06g41010.4 13106.m04278 cDNA | zinc finger A20 and AN1 domain-containing stress-associated protein, putative, expressed |
|       | contig11314 (178)                                                                                                                                                                    | LOC_Os05g49890.1 13105.m05344 cDNA | ras-related protein, putative, expressed                                                 |
|       | contig03678 (164.2)                                                                                                                                                                  | LOC_Os12g34014.1 13112.m08836 cDNA | NADH-ubiquinone oxidoreductase chain 6, putative                                         |
|       | contig10858 (149.9)                                                                                                                                                                  | LOC_Os07g25002.1 13107.m09917 cDNA | chloroplast 30S ribosomal protein S7, putative, expressed                                |
|       | contig07674 (145.9)                                                                                                                                                                  | LOC_Os04g02820.2 13104.m00200 cDNA | elongation factor, putative, expressed                                                   |

---
