# Supplementary material
Source: PubMed Central journal article supplement (PMC3554450)
Supplement: hdy201276x2.pdf [file hdy201276x2.pdf]

**Genes ecologically important found in the *Spartina* reference transcriptome**

| Biological function           | Gene annotation                                  | Number of regions in the Sorghum genome | Contig               |
|-------------------------------|--------------------------------------------------|-----------------------------------------|----------------------|
| Salt Stress response          | aminotransferase y4ub                            | 1 region                                | contig05155 (203bp)  |
|                               | ascorbate peroxidase                             | 2 regions                               | contig03891 (213bp)  |
|                               | glutamine synthetase                             | 3 regions                               | contig00436 (576bp)  |
|                               | glutathione peroxidase                           | 6 regions                               | contig02833 (717bp)  |
|                               | glycine-rich rna-binding protein 2               | 1 region                                | contig08503 (816bp)  |
|                               | heat shock cognate 70 kda protein 2              | 6 regions                               | contig08692 (419bp)  |
|                               | heat shock protein 90                            | 2/3 regions                             | contig00999 (110bp)  |
|                               | snf1-related protein kinase                      | 2 regions                               | contig00588 (316bp)  |
|                               | thioredoxin peroxidase                           | 2 regions                               | contig10727 (120bp)  |
|                               | xanthine dehydrogenase                           | 1 region                                | contig01057 (652bp)  |
|                               | zeaxanthin epoxidase                             | 1 region                                | contig11210 (345bp)  |
|                               | histone acetyltransferase                        | 1/2 regions                             | contig09039 (681bp)  |
|                               | histone acetyltransferase complex component      | 1 region                                | contig03573 (1012bp) |
|                               | c2-h2 zinc finger protein                        | 2 regions                               | contig06019 (1241bp) |
|                               | wrky dna binding domain containing expressed     | 1 region                                | contig13023 (359bp)  |
|                               | af193802_1zinc finger transcription factor wrky1 | 1 region                                | contig09657 (359bp)  |
|                               | wrky dna-binding protein 3                       | 3 regions                               | contig04256 (1147bp) |
| Heavy metal Stress response   | citrate synthase                                 | 1 region                                | contig01822 (1260bp) |
|                               | cytochrome p450                                  | 2/3 regions                             | contig00832 (804bp)  |
|                               | glycine hydroxymethyltransferase                 | 1 region                                | contig06823 (659bp)  |
|                               | heat shock 70 kda protein                        | 2 regions                               | contig01702 (560bp)  |
|                               | metal tolerance protein a2                       | 1 region                                | contig01235 (536bp)  |
|                               | metal tolerance protein                          | 1 region                                | contig01973 (780bp)  |
| Lignin & Cellulose metabolism | cellulose synthase                               | 3 regions                               | contig00754 (122bp)  |
|                               | cinnamoyl- reductase                             | 1 region                                | contig10883 (333bp)  |
|                               | glycosyltransferase 48 kdasubunit precursor      | 1 region                                | contig00709 (1274bp) |
|                               | gdp-mannose pyrophosphorylase                    | 3 regions                               | contig06944 (446bp)  |
