# Supplementary material
Source: PubMed Central journal article supplement (PMC3554450)
Supplement: hdy201276x3.pdf [file hdy201276x3.pdf]

Genes whose expression is altered following speciation in *Spartina*

| <i>Spartina</i> contig | length (bp) | Number of regions in the Sorghum genome | Gene annotation                                   | GO accession number | Biological process function                                 |
|------------------------|-------------|-----------------------------------------|---------------------------------------------------|---------------------|-------------------------------------------------------------|
| contig29975            | 480         | 3 regions                               | bhlh transcription factor                         | GO:0030528          | transcription regulator activity                            |
| contig09805            | 1100        | 1 region                                | ccaat-box transcription factor complex expressed  | GO:0003700          | transcription factor activity                               |
| contig10492            | 320         | 2 regions                               | cytochrome c oxidase polypeptide vib              | GO:0006123          | mitochondrial electron transport, cytochrome c to oxygen    |
| contig29230            | 469         | 1 region                                | cytochrome c oxidase subunit 1                    | GO:0005507          | copper ion binding                                          |
| contig32516            | 493         | 5 regions                               | global transcription factor group                 | GO:0006357          | regulation of transcription from RNA polymerase II promoter |
| contig06826            | 841         | 2 regions                               | glutathione s-transferase                         | GO:0046686          | response to cadmium ion                                     |
| contig16114            | 472         | 5 regions                               | glutathione s-transferase gstu6                   | GO:0004364          | glutathione transferase activity                            |
| contig20419            | 1088        | 2 regions                               | hexokinase 2                                      | GO:0030528          | transcription regulator activity                            |
| contig13824            | 1145        | 2 regions                               | myb family transcription factor                   | GO:0045449          | regulation of transcription                                 |
| contig04589            | 563         | 2 regions                               | myb transcription factor                          | GO:0003677          | DNA binding                                                 |
| contig18882            | 1230        | 1 region                                | peptide transporter ptr2                          | GO:0000325          | plant-type vacuole                                          |
| contig05684            | 428         | 3 regions                               | peroxidase 1                                      | GO:0006979          | response to oxidative stress                                |
| contig15367            | 883         | 1 region                                | retrotransposon protein                           | GO:0005739          | mitochondrion                                               |
| contig13583            | 1064        | 2 regions                               | seuss transcriptional co-regulator                | GO:0009790          | embryonic development                                       |
| contig31047            | 311         | 2 regions                               | transcription factor iia small subunit            | GO:0005672          | transcription factor TFIIA complex                          |
| contig30693            | 780         | 1 region                                | transcription initiation factor iib               | GO:0003743          | translation initiation factor activity                      |
| contig08620            | 1174        | 3 regions                               | vacuolar h <sup>+</sup> -atpase catalytic subunit | GO:0005618          | cell wall                                                   |
